# Supplementary material for: Mediterranean Built Environment and Precipitation as Modulator Factors on Physical Activity in Obese Mid-Age and Old-Age Adults with Metabolic Syndrome: Cross-Sectional Study
Source: MDPI journal article supplement (doi:10.3390/ijerph16050854), 2019-03-08
Supplement: s1 [file s1]

**Supplementary Table S1.** Descriptive statistics of objectively-assessed POS for a 500 m sausage network walkable street buffer. Values shown are mean (SD).

| <b>Objectively-Assessed POS</b>                                                 | <b>Mean (SD)</b> |
|---------------------------------------------------------------------------------|------------------|
| Coast line contained or intersected by buffer (km)                              | 0 (0.03)         |
| Healthy routes contained or intersected by buffer (km)                          | 1.11 (1.1)       |
| No. sports facilities contained or intersected by buffer                        | 0.52 (0.73)      |
| Area of sports facilities contained or intersected by buffer (km <sup>2</sup> ) | 0 (0.01)         |
| No. parks contained or intersected by buffer                                    | 2.88 (1.88)      |
| Areas of parks contained or intersected by buffer (km <sup>2</sup> )            | 0.08 (0.21)      |
| No. beaches contained or intersected by buffer                                  | 0.02 (0.13)      |
| Areas of beaches contained or intersected by buffer (km <sup>2</sup> )          | 0 (0)            |
| No. POS contained or intersected by buffer                                      | 3.42 (2.21)      |
| Areas of POS contained or intersected by buffer (km <sup>2</sup> )              | 0.08 (0.21)      |

Abbreviations: SD, standard deviation; POS, public open spaces; km, Kilometer; km<sup>2</sup>, square kilometer.

**Supplementary Table S2.** Summary of the results associations between objectively-assessed public open spaces (POS) for a 500 m sausage network walkable street buffer and self-reported leisure-time brisk walking measure and 10-minute bouts of OM-MVPA. The results for the following model comparisons are provided: Covariate-adjusted POS GAMs.

| Predictor Variable                                                              | Self-Reported Leisure-Time Brisk Walking           |                 |                | Objectively-Measured-MVPA |                  |                 |
|---------------------------------------------------------------------------------|----------------------------------------------------|-----------------|----------------|---------------------------|------------------|-----------------|
|                                                                                 | $\beta$                                            | 95% CI          | <i>p</i>       | $\beta$                   | 95% CI           | <i>p</i>        |
|                                                                                 | Coast line contained or intersected by buffer (km) | -59.806         | -171.074–51.46 | 0.293                     | -32.999          | -127.145–61.146 |
| Healthy routes contained or intersected by buffer (km)                          | 1.376                                              | -1.798–4.549    | 0.396          | 1.491                     | -1.187–4.169     | 0.277           |
| No. sports facilities contained or intersected by buffer                        | 1.692                                              | -3.079–6.462    | 0.488          | 1.580                     | -2.449–5.609     | 0.443           |
| Area of sports facilities contained or intersected by buffer (Km <sup>2</sup> ) | 207.995                                            | -113.202–529.19 | 0.206          | -72.160                   | -344.378–200.058 | 0.604           |
| No. parks contained or intersected by buffer                                    | -0.267                                             | -2.132–1.597    | 0.779          | 0.353                     | -1.222–1.928     | 0.661           |
| Areas of parks contained or intersected by buffer (km <sup>2</sup> )            | -12.612                                            | -29.097–3.872   | 0.135          | -10.196                   | -24.129–3.737    | 0.153           |
| No. beaches contained or intersected by buffer                                  | 18.841                                             | -7.084–44.766   | 0.156          | -6.006                    | -27.998–15.987   | 0.593           |
| Areas of beaches contained or intersected by buffer (km <sup>2</sup> )          | 716.339                                            | -852.14–2284.82 | 0.372          | -324.53                   | -1651.44–1002.37 | 0.632           |
| No. POS contained or intersected by buffer                                      | 0.063                                              | -1.52–1.646     | 0.938          | 0.406                     | -0.931–1.742     | 0.552           |
| Areas of POS contained or intersected by buffer (km <sup>2</sup> )              | -11.960                                            | -28.438–4.517   | 0.156          | -10.403                   | -24.32–3.514     | 0.144           |

Abbreviations:  $\beta$ , non-standardized coefficient; 95% CI, confidence interval; *p*, *p*-value; MVPA, moderate-to-vigorous physical activity in bouts of at least 10 min.  $\beta$  indicates change in self-reported leisure-time brisk walking or OM-MVPA per minutes per day (min/day) per increment (in 1 km, 1 km<sup>2</sup>, or count) in access to public open spaces (POS). Individual-level covariate (sex, education level and self-rated health).

**Supplementary Table S3.** Summary of the results associations between objectively-access to Public Open Spaces (POS) for 500 m sausage network walkable street buffer and 10 minutes bouts OB-MVPA. The results for the following model comparisons are provided: Covariate-adjusted POS GAMMs.

| Predictor Variable                                                   | <sup>a</sup> Objectively-Assessed MVPA 10 Minutes Bouts (Minutes/Day) ( <i>n</i> = 216) |               |              | <sup>b</sup> Engaging in $\geq 150$ min/week Objectively-Assessed MVPA 10 min Bouts ( <i>n</i> = 216) |             |            |
|----------------------------------------------------------------------|-----------------------------------------------------------------------------------------|---------------|--------------|-------------------------------------------------------------------------------------------------------|-------------|------------|
|                                                                      | $\beta$                                                                                 | 95% CI        | <i>p</i>     | OR                                                                                                    | 95% CI      | <i>p</i>   |
|                                                                      | Healthy routes contained or intersected by buffer (km)                                  | 1.334         | -1.357–4.025 | 0.332                                                                                                 | 1.083       | 0.81–1.448 |
| No. sports facilities contained or intersected by buffer             | 1.078                                                                                   | -3.094–5.249  | 0.613        | 1.234                                                                                                 | 0.813–1.874 | 0.325      |
| No. parks contained or intersected by buffer                         | 0.522                                                                                   | -1.159–2.203  | 0.544        | 1.058                                                                                                 | 0.894–1.25  | 0.518      |
| Areas of parks contained or intersected by buffer (km <sup>2</sup> ) | -7.474                                                                                  | -20.942–5.994 | 0.278        | 0.304                                                                                                 | 0.039–2.335 | 0.253      |
| No. POS contained or intersected by buffer                           | 0.459                                                                                   | -0.971–1.89   | 0.53         | 1.061                                                                                                 | 0.922–1.22  | 0.411      |
| Areas of POS contained or intersected by buffer (km <sup>2</sup> )   | -7.697                                                                                  | -21.161–5.766 | 0.264        | 0.308                                                                                                 | 0.041–2.319 | 0.254      |

Abbreviations:  $\beta$ , non-standardized coefficient; OR, odds ratio; 95% CI, confidence interval;  $p$ ,  $p$ -value.  $\beta$ , indicates change in 10 min bouts OB-MVPA per minutes per day (min/day) per increment (in 1 km, 1 km<sup>2</sup> or count) in access to public open spaces (POS). All coefficients are adjusted for individual-level covariate (sex, age, education level and self-rated health). <sup>a</sup> GAMMs with gaussian variance and identity link functions. <sup>b</sup> GAMM with binomial variance and logit link functions.

**Supplementary Table S4.** Summary of the interaction between objectively-access to Public Open Spaces (POS) for distance and 1000m sausage network walkable street buffer and 10 minutes bouts OB-MVPA. The results for the following model comparisons are provided: Covariate-adjusted POS GAMMs.

| Predictor Variable                                                      | <sup>a</sup> Objectively-Assessed MVPA 10 min Bouts<br>(Minutes/Day) ( $n = 216$ ) |         |                |       | <sup>b</sup> Engaging in $\geq 150$ min/week<br>Objectively-Assessed MVPA<br>10 minBouts ( $n = 216$ ) |       |             |       |
|-------------------------------------------------------------------------|------------------------------------------------------------------------------------|---------|----------------|-------|--------------------------------------------------------------------------------------------------------|-------|-------------|-------|
|                                                                         | $p$ . int                                                                          | $\beta$ | 95% CI         | $p$   | $p$ .int                                                                                               | OR    | 95% CI      | $p$   |
| Distance to the coast (km)                                              | 0.403                                                                              | 0.794   | -1.733-3.32    | 0.539 | 0.253                                                                                                  | 1.148 | 0.906-1.454 | 0.255 |
| Distance to the healthy route for walking (km)                          | 0.412                                                                              | -1.422  | -8.894-6.049   | 0.709 | 0.085                                                                                                  | 0.871 | 0.478-1.588 | 0.653 |
| Distance to the nearest sports facility (km)                            | 0.230                                                                              | -3.626  | -10.019-2.767  | 0.268 | 0.333                                                                                                  | 0.861 | 0.47-1.576  | 0.627 |
| Distance to the nearest beach (km)                                      | 0.996                                                                              | -1.102  | -3.929-1.726   | 0.446 | 0.448                                                                                                  | 1.000 | 0.769-1.302 | 0.997 |
| Distance to the nearest Park (km)                                       | 0.832                                                                              | -4.110  | -14.316-6.097  | 0.431 | 0.480                                                                                                  | 0.770 | 0.317-1.869 | 0.565 |
| Healthy routes contained or intersected by<br>buffer (km)               | 0.028                                                                              | 1.912   | 0.622-3.202    | 0.004 | 0.071                                                                                                  | 1.120 | 0.978-1.282 | 0.103 |
| No. sports facilities contained or intersected by<br>buffer             | 0.156                                                                              | 2.290   | -0.575-5.155   | 0.119 | 0.599                                                                                                  | 1.103 | 0.83-1.464  | 0.501 |
| No. parks contained or intersected by buffer                            | 0.894                                                                              | 0.503   | -0.305-1.312   | 0.224 | 0.532                                                                                                  | 1.000 | 0.922-1.084 | 0.994 |
| Areas of parks contained or intersected by<br>buffer (km <sup>2</sup> ) | 0.939                                                                              | -4.568  | -19.597-10.46  | 0.552 | 0.874                                                                                                  | 0.743 | 0.153-3.618 | 0.713 |
| No. POS contained or intersected by buffer                              | 0.655                                                                              | 0.487   | -0.201-1.174   | 0.167 | 0.678                                                                                                  | 1.005 | 0.939-1.076 | 0.882 |
| Areas of POS contained or intersected by<br>buffer (km <sup>2</sup> )   | 0.945                                                                              | -4.372  | -19.398-10.654 | 0.569 | 0.974                                                                                                  | 0.731 | 0.15-3.576  | 0.699 |

Abbreviations:  $p$ .int,  $p$ -value for interaction each POS and rain during the accelerometer wearing period;  $\beta$ , non-standardized coefficient OR, odds ratio; 95% CI, confidence interval;  $p$ ,  $p$ -value.  $\beta$ , indicates change in 10 minutes bouts OB-MVPA per minutes per day (min/day) per increment (in 1 km, 1 km<sup>2</sup> or count) in access to public open spaces (POS). All coefficients are adjusted for individual-level covariate (sex, age, education level and self-rated health). <sup>a</sup> GAMMs with gaussian variance and identity link functions. <sup>b</sup> GAMM with binomial variance and logit link functions.

**Supplementary Table S5.** Summary of the interaction between objectively-access to Public Open Spaces (POS) for 500 m sausage network walkable street buffer and 10 minutes bouts OB-MVPA. The results for the following model comparisons are provided: Covariate-adjusted POS GAMMs.

| Predictor Variable                                                   | <sup>a</sup> Minutes/day<br>Objectively-Assessed MVPA 10 min Bouts<br>( <i>n</i> = 216) |         |                |          | <sup>a</sup> Engaging in $\geq 150$ min/week<br>Objectively-Assessed MVPA<br>10 min Bouts ( <i>n</i> = 216) |       |             |          |
|----------------------------------------------------------------------|-----------------------------------------------------------------------------------------|---------|----------------|----------|-------------------------------------------------------------------------------------------------------------|-------|-------------|----------|
|                                                                      | <i>p.int</i>                                                                            | $\beta$ | 95% CI         | <i>p</i> | <i>p.int</i>                                                                                                | OR    | 95% CI      | <i>p</i> |
| Healthy routes contained or intersected by buffer (km)               | 0.135                                                                                   | 3.410   | -0.395-7.215   | 0.081    | 0.175                                                                                                       | 1.303 | 0.879-1.933 | 0.188    |
| No. sports facilities contained or intersected by buffer             | 0.471                                                                                   | 2.458   | -3.03-7.947    | 0.381    | 0.731                                                                                                       | 1.307 | 0.765-2.233 | 0.329    |
| No. parks contained or intersected by buffer                         | 0.455                                                                                   | 1.008   | -1.191-3.207   | 0.370    | 0.299                                                                                                       | 1.134 | 0.913-1.409 | 0.256    |
| Areas of parks contained or intersected by buffer (km <sup>2</sup> ) | 0.640                                                                                   | -4.915  | -22.461-12.63  | 0.584    | 0.817                                                                                                       | 0.368 | 0.03-4.502  | 0.435    |
| No. POS contained or intersected by buffer                           | 0.373                                                                                   | 0.939   | -0.879-2.757   | 0.312    | 0.316                                                                                                       | 1.119 | 0.937-1.336 | 0.215    |
| Areas of POS contained or intersected by buffer (km <sup>2</sup> )   | 0.628                                                                                   | -5.047  | -22.597-12.503 | 0.574    | 0.791                                                                                                       | 0.382 | 0.033-4.495 | 0.445    |

Abbreviations: *p.int*, *p*-value for interaction each POS and rain during the accelerometer wearing period;  $\beta$ , non-standardized coefficient OR, odds ratio; 95%CI, confidence interval; *p*, *p*-value.  $\beta$ , indicates change in 10 min bouts OB-MVPA per minutes per day (min/day) per increment (in 1 km, 1 km<sup>2</sup> or count) in access to public open spaces (POS). All coefficients are adjusted for individual-level covariate (sex, age, education level and self-rated health). <sup>a</sup> GAMMs with gaussian variance and identity link functions. <sup>b</sup> GAMM with binomial variance and logit link functions.
